# Supplementary material for: A molecular mechanism for the “digital” response of p53 to stress
Source: PubMed Central journal article supplement — Proc Natl Acad Sci U S A. 2023 Nov 28;120(49):e2305713120. doi: 10.1073/pnas.2305713120 (PMC10710088; doi:10.1073/pnas.2305713120), 2023-11-28
Supplement: pnas.2305713120.sapp.pdf [file pnas.2305713120.sapp.pdf]

## Supporting Information for

### A molecular mechanism for the ‘digital’ response of p53 to stress

Jessy Safieh<sup>1</sup>, Ariel Chazan<sup>1</sup>, Hanna Saleem<sup>1</sup>, Pratik Vyas<sup>1,2</sup>, Yael Danin-Poleg<sup>1</sup>,  
Dina Ron<sup>1,3</sup>, and Tali E. Haran<sup>1,3</sup>.

<sup>1</sup> Department of Biology, Technion, Technion City, Haifa, Israel

<sup>2</sup> Present address: Department of Chemical and Biological Physics, Weizmann Institute of Science, Rehovot, Israel

<sup>3</sup> To whom correspondence may be addressed.

Email: [bitali@technion.ac.il](mailto:bitali@technion.ac.il)

Email: [dinar@technion.ac.il](mailto:dinar@technion.ac.il)

#### **This PDF file includes:**

Supporting text  
Figures S1 to S4  
Tables S1 to S5  
Legend for Dataset S1  
SI References

#### **Other supporting materials for this manuscript include the following:**

Dataset S1

## Supporting Information Text

### SI Materials and Methods

#### Cyclization kinetics and simulation of cyclization data

DNA constructs for cyclization kinetics were synthesized using the top library/bottom test sequence PCR scheme, described previously (1-4), except that here we used as test sequences DNA sequences containing the full 20-bp long p53 sites plus 5-bp flanking sequences on both sides, specific for each natural p53 site (see Table S3 for sequences). The DNA test sequences for cyclization experiments (bottom PCR templates) were synthesized by Sigma Genosys (Israel), whereas the library DNA sequences (top PCR templates) and the fluorescein- and tetramethylrhodamine (TAMRA)-labeled oligonucleotide primers were synthesized by the Keck foundation Laboratory at Yale University. Cyclization kinetics measurements were carried out as described previously (2-4). PCR reactions (50  $\mu$ l) contained 1 $\times$  PrimeSTAR buffer, 0.2 mM dNTP mix, 0.3  $\mu$ M of each of the primers, 100 nM of the top and bottom templates, and 0.04 units of PrimeSTAR DNA polymerase (Takara, Japan, Cat # R010B). Ligase concentration was varied as a function of phasing length (0.08 U/ $\mu$ l for the in-phase 156L14 and 156L16 constructs and 1.0 U/ $\mu$ l for all other phasing constructs) and total length (from 0.08 U/ $\mu$ l for the 157 constructs, to 0.8 U/ $\mu$ l for the 154–155 and 158–160 constructs and 2.5 U/ $\mu$ l for the 150–153 constructs). We derived quantitative data on the conformational properties of the test sequences by simulating the cyclization data as previously described (2-5), using the simulation program developed by Zhang and Crothers (5). The outcome of the simulations are the bend angle, twist angle, roll and tilt flexibility and twist flexibility per DNA sequence.

#### Cells, plasmids, and reagents

H1299 human non-small lung carcinoma cells (p53-null cells) were obtained from ATTC (CRL-5803). H1299 cells were grown in RPMI-1640 (Biological Industries, Beth Haemek, Cat # 01-101-1A), and MCF-7 breast cancer cells were grown in DMEM (Biological Industries). Both mediums were supplemented with 10% Fetal Bovine Serum (Biological Industries, Beth Haemek, Cat # 04-127-1A), 2 mM L-glutamine, and 1% Pen-Strep solution (Biological Industries, Beth Haemek, Cat # 31-031-1C). All experiments were performed in these specified mediums. Cells were maintained in a humidified incubator at 37°C and 5% CO<sub>2</sub>. Cells were routinely checked for negative mycoplasma infection.

The reporter gene vectors pCluc Mini- TK 2, encoding *Cypridina* secreted luciferase under the control of a minimal promoter, and pCMV-GLuc, encoding constitutively expressed *Gaussia* secreted luciferase, were purchased from Thermo-Fisher. pC53-SN3 construct (where p53 expression is driven by the CMV promoter) was used for wild-type p53 expression in H1299 cells. p53 expression plasmid was kindly provided by Varda Rotter, Weizmann Institute of Science, Rehovot, Israel.

#### Generation of reporter plasmids containing p53 REs

All DNA sequences were synthesized by Sigma Genosys (Israel), purified by standard desalting, and are described in Table S5. The sequences corresponding to p53 REs, each containing also 5-bp flanking sequences on both the 5' and the 3' sides, were cloned upstream to the CLuc gene (encoding the *Cypridina* luciferase) in the pCluc Mini-TK plasmids using site-directed mutagenesis with KAPA HiFi™ DNA Polymerase kit (Gamidor Diagnostics), and transformed into competent DH5 $\alpha$  cells, according to manufacturer recommendations. Overexpressed plasmids were extracted using QIAprep® Spin Miniprep Kit (Qiagen), according to the manufacturer's protocol. The correct identity of incorporated sequences was verified using Sanger sequencing.

#### Stress induction

MCF-7 cells were grown in 35 mm plates at a density of 4.5 $\times$ 10<sup>5</sup> cells. Cells were allowed to reach 80% confluency in a fresh medium before treatment. Exponentially growing cells

were exposed to either 2  $\mu\text{M}$  or 10  $\mu\text{M}$  Camptothecin (CPT) and harvested at the indicated time points post incubation with CPT.

### p53 protein quantitation and detection

All cells were lysed in RIPA buffer (150 mM NaCl, 1% NP-40, 0.5% Na deoxycholate, 0.1% SDS, 25 mM Tris-Cl, pH 7.5) containing 1/100 (Vol/Vol) Protease inhibitor cocktail (Sigma, Cat # P8340). An equal amount of whole cell lysate proteins from the different samples were resolved on 10% SDS PAGE, and transferred to PVDF membrane. The blots were subsequently incubated at 4°C with primary antibodies against p53 (DO-7 mouse mAb, Cell Signaling, Cat # 48818) and  $\beta$  actin (13E5 rabbit mAb, Cell Signaling, Cat # 4970), sequentially. Membranes were then reacted with a secondary antibody (Anti-mouse IgG, and Anti-rabbit IgG conjugated to Horseradish Peroxidase (both from Cell Signaling, Cat # 7076 and # 7074, respectively), developed using Western Bright™ enhanced chemiluminescence reagent (Advansta), air-dried, and exposed using Fusion Pulse (Vilber) detection system, followed by quantitation using Cliqs software (version 1.1, TotalLab Ltd., UK). For p53 serial-dilution curve, full-length recombinant p53 protein was resolved on gels together with the transfection samples.

### Information content analysis

Information content per DNA binding site (Iseq, ref. 6, 7) was calculated separately for the whole set of REs as well as for the flexible, the rigid functional outcome categories and the group with intermediate flexibility, on the mononucleotide level, using the following equations:

$$(1) Iseq(mono) = \sum_{l=1}^S Iseq_l(mono) = \sum_{l=1}^S \sum_{B=0}^3 f_{lb} * \ln \frac{f_{lb}}{P_B} = \sum_{l=1}^S \sum_{B=0}^3 f_{lb} * \ln(4 * f_{lb})$$

Where  $Iseq_l(mono)$  is the mononucleotide information content per position,  $f_{lb}$  is the frequency of occurrence of base  $B$  in position  $l$  in the population of all possible binding sites, and  $P_B$  of base  $B$  is the frequency in the whole genome, which is usually taken to be 0.25 for each base. To correct for small sample size, we replaced equation (1) with the following equation, shown to be the best estimate for the sequence information when  $f_{lb}$  is unknown precisely (7):

$$(2) Iseq(mono) = \sum_{l=1}^S Iseq_l(mono) = \sum_{l=1}^S \sum_{B=0}^3 \left( \frac{n_{lb}+1}{N+4} \right) * \ln \left( 4 * \frac{n_{lb}+1.5}{N+4.5} \right)$$

Where  $N$  is the sample size, and  $n_{lb}$  is the number of occurrences of base-pair  $B$  ( $B = 0, 1, 2, 3$ ) at position  $l$ . The expected variance in assigning  $f_{lb}$  values was calculated from (6):

$$(3) \sigma_B^2 = \langle f_B^2 \rangle - \langle f_B \rangle^2 = \frac{(n_{lB}+1)(N-n_{lB}+1)}{(N+4)^2(N+5)}$$

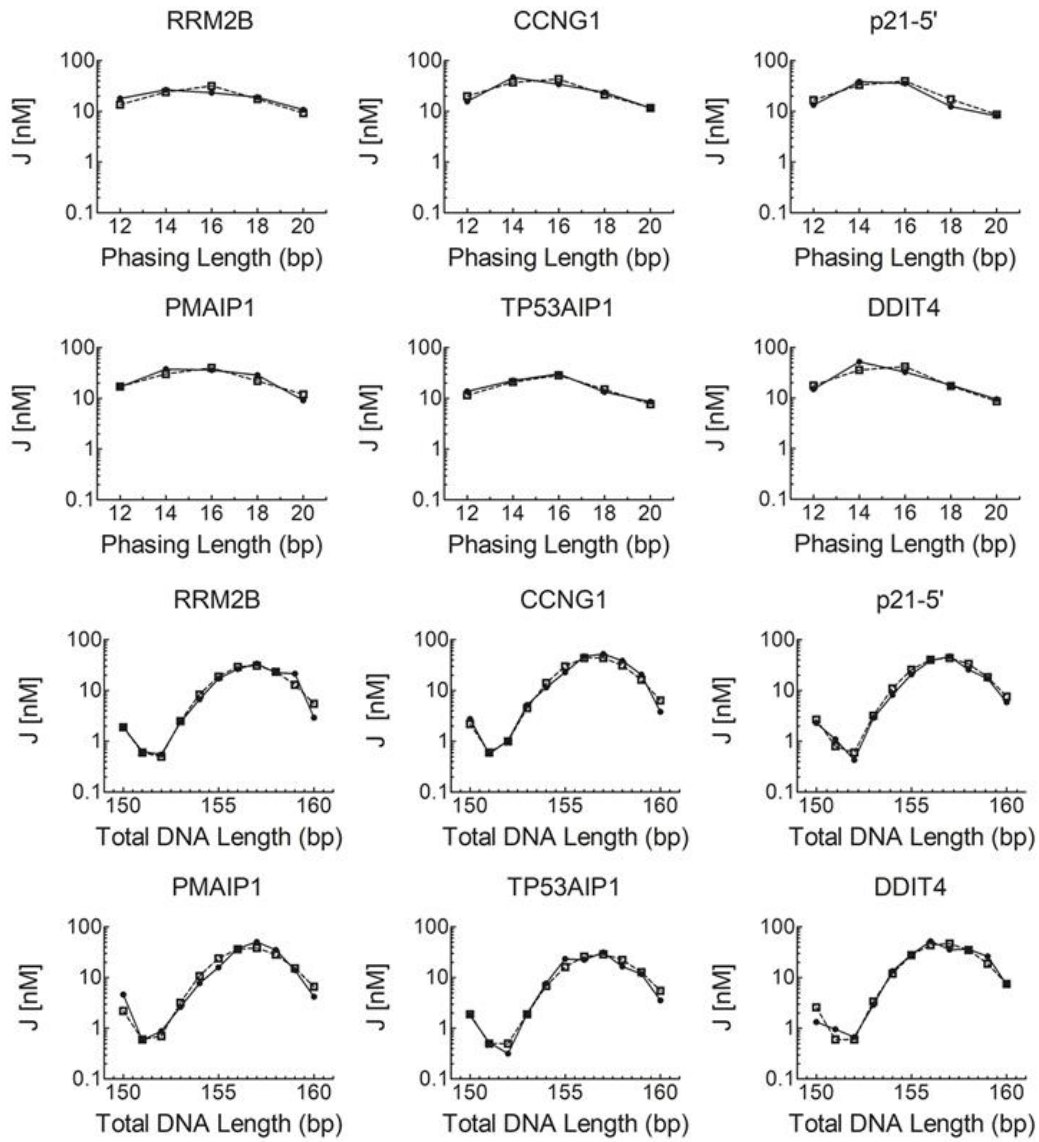

**Fig. S1.** Cyclization kinetics of p53 REs. The J-factors for the DNA constructs as a function of either the phasing length (top two rows), or the total DNA length (bottom two rows). The solid lines are the experimental curves and the dashed lines are the curves from simulating the data.

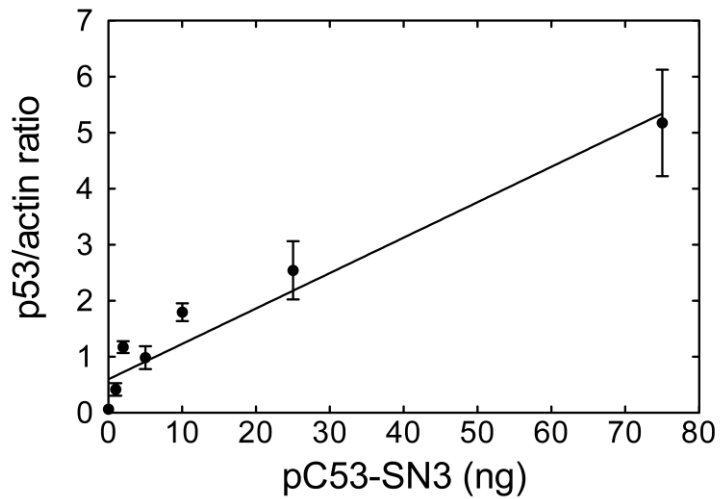

**Fig. S2.** Validation of ectopic p53 expression level in H1299 cells. Correlation between pC53-SN3 plasmid amount at the transfection against p53 protein level relative to  $\beta$ -actin, derived from the gel shown in Figure 4D. p53 protein level was estimated by normalizing the band intensity of p53 protein to the band intensity of  $\beta$ -Actin from the same sample. There is a linear relationship between the amounts of p53 expressing plasmid used in the transfection and the observed p53 protein levels ( $r = 0.972$ ,  $P < 0.0001$ ). The results are averages of four independent experiments.

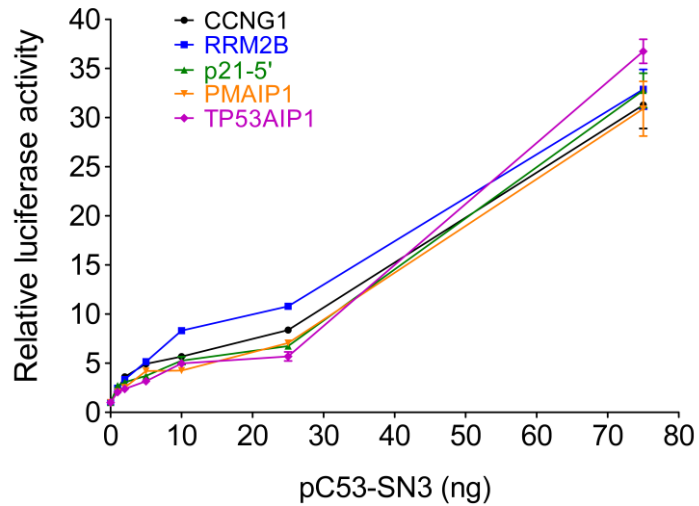

**Fig. S3.** Luciferase activity from p53 REs using 75 ng p53 expression vector. Shown are luciferase reporter gene assays in human non-small lung carcinoma cell line (H1299) ectopically expressing p53 along with reporter plasmids. The figure shows fold increase in transactivation level 48 h post-transfection, using 75 ng p53 expression vector. Luminescence values were normalized to the transfection efficiency of co-transfected, constitutively expressed Gaussia luciferase (Gluc). Results were further normalized first to the empty Cypridina secreted luciferase (CLuc) vector, and then to results obtained without p53. Error bars represent the mean  $\pm$  SD of four independent experiments, each containing two technical replicas.

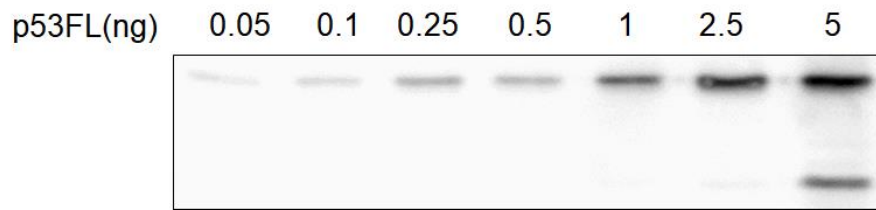

**Fig. S4.** Serial dilution of purified full-length p53 recombinant protein (5 sec exposure). The lower band in the 5-ng lane is a degradation product, which was included in the quantification.

**Table S1.** End functional-outcome groups with at least five genes each (related to Figure 1)

| <b>Group</b>                          | <b>Functional outcomes included in the group</b>                                                                                                                                                                                                                                                                                         |
|---------------------------------------|------------------------------------------------------------------------------------------------------------------------------------------------------------------------------------------------------------------------------------------------------------------------------------------------------------------------------------------|
| Cell adhesion/anti-cell-motility      | Increase in cell-matrix adhesion; increase in cell-cell adhesion; anti-metastasis; anti-migration; anti-invasion; anti-angiogenesis                                                                                                                                                                                                      |
| Cell growth                           | Cell division machinery; mitotic cell cycle; mitotic spindle organization; regulation of cytokinesis; symmetric cell division                                                                                                                                                                                                            |
| Cell signaling                        | Signal transduction by various pathways, when the signaling event is followed by multiple possible functional outcome results                                                                                                                                                                                                            |
| Cellular stress response              | Response to severe stress resulting from: ER stress, metabolic stress, energetic stress, hypoxia, heat stress, cold stress, osmotic stress, oxidative stress, and oxidative DNA damage. Unfolded protein response; stress granules formation; cellular stress response; response to severe stress                                        |
| Cytoskeleton/cell motility            | Cytoskeleton organization; actin polymerization; ECM degradation; muscle contraction; neuronal migration; movement along microtubules; directional migration; apical-basal polarity; cytoskeleton re-organization; axon guidance; migration; invasion; wound healing; EMT; platelet aggregation; angiogenesis; decrease in cell adhesion |
| Development                           | Embryonic development; morphogenesis; neurogenesis; synaptogenesis; muscle development                                                                                                                                                                                                                                                   |
| DNA repair                            | Damage repair; translesion DNA synthesis; synthesis of dNTPs                                                                                                                                                                                                                                                                             |
| Early DNA damage response (DDR) steps | DNA damage response activation; cell-cycle arrest (G1/S and G2/M); p53 positive regulation; other events closely following DNA damage; immediate early genes for DDR                                                                                                                                                                     |
| Energy metabolism                     | Energy metabolism; glucose metabolism; oxidative phosphorylation; ATP synthesis                                                                                                                                                                                                                                                          |
| Extrinsic apoptosis                   | Death receptor pathway                                                                                                                                                                                                                                                                                                                   |
| Innate immunity                       | Innate immune response; inflammation; pyroptosis                                                                                                                                                                                                                                                                                         |
| Intrinsic apoptosis                   | Intrinsic apoptosis machinery and effectors                                                                                                                                                                                                                                                                                              |
| Ion homeostasis                       | Ion channels; ion transport; transport of small molecules                                                                                                                                                                                                                                                                                |
| Lipid metabolism                      | Lipid metabolism; lipid droplets; cholesterol metabolism; steroids metabolism; steroidogenesis                                                                                                                                                                                                                                           |
| Membrane trafficking                  | Endocytosis; exocytosis; vesicle transport; secretory pathways; Golgi; membrane transport; vesicular lipid transport                                                                                                                                                                                                                     |
| p53 negative regulation               | Targeting p53 for destruction; p53 down regulation after damage repair                                                                                                                                                                                                                                                                   |
| Stem cells and differentiation        | Stem cell biology; stem cells self-renewal; pluripotency maintenance and regulation; stem cells differentiation                                                                                                                                                                                                                          |
| Survival                              | Anti-apoptosis; anti-necrosis; anti-pyroptosis; anti other kinds of deaths; cell survival                                                                                                                                                                                                                                                |



**Table S2.** Significant differences between deformability values ( $V(B)^{0.3}\text{Å}^3$ ) grouped by functional outcome of gene activation by p53

| <b>First outcome group</b> | <b>to second outcome group</b> | <b>Score mean difference<sup>a</sup></b> | <b>Std error difference<sup>b</sup></b> | <b>Z<sup>c</sup></b> | <b>P-Value</b> |
|----------------------------|--------------------------------|------------------------------------------|-----------------------------------------|----------------------|----------------|
| Development                | Cellular stress response       | 146.3                                    | 23.9                                    | 6.109                | <.0001         |
| Development                | Cytoskeleton/cell motility     | 125.6                                    | 20.7                                    | 6.058                | <.0001         |
| Development                | Intrinsic apoptosis            | -134.4                                   | 24.6                                    | -5.462               | <.0001         |
| Development                | p53 negative regulation        | -145.5                                   | 29.3                                    | -4.961               | 0.0001         |
| Early DDR steps            | Cellular stress response       | 125.9                                    | 29.3                                    | 4.293                | 0.0027         |
| Early DDR steps            | Cytoskeleton/cell motility     | 105.2                                    | 26.8                                    | 3.930                | 0.013          |
| Early DDR steps            | Intrinsic apoptosis            | -114.0                                   | 29.9                                    | -3.817               | 0.0207         |
| Early DDR steps            | p53 negative regulation        | -125.1                                   | 33.9                                    | -3.694               | 0.0338         |
| Energy homeostasis         | Cellular stress response       | 147.6                                    | 27.7                                    | 5.336                | <.0001         |
| Energy homeostasis         | Cytoskeleton/cell motility     | 126.9                                    | 24.9                                    | 5.090                | <.0001         |
| Energy homeostasis         | Intrinsic apoptosis            | -135.6                                   | 28.2                                    | -4.806               | 0.0002         |
| Energy homeostasis         | p53 negative regulation        | -146.8                                   | 32.4                                    | -4.526               | 0.0009         |
| Innate immunity            | Cellular stress response       | 121.7                                    | 21.3                                    | 5.702                | <.0001         |
| Innate immunity            | Cytoskeleton/cell motility     | 101.0                                    | 17.7                                    | 5.718                | <.0001         |
| Innate immunity            | Intrinsic apoptosis            | -109.8                                   | 22.1                                    | -4.973               | 0.0001         |
| Innate immunity            | p53 negative regulation        | -120.9                                   | 27.2                                    | -4.437               | 0.0014         |
|                            |                                |                                          |                                         |                      |                |
| Lipid homeostasis          | Cellular stress response       | 103.6                                    | 25.4                                    | 4.077                | 0.007          |
| Lipid homeostasis          | Cytoskeleton/cell motility     | 82.9                                     | 22.4                                    | 3.700                | 0.033          |
| Cell signaling             | Cellular stress response       | -86.3                                    | 20.7                                    | -4.160               | 0.0049         |
| Cell signaling             | Cytoskeleton/cell motility     | -65.6                                    | 16.9                                    | -3.874               | 0.0164         |

<sup>a</sup> Score mean difference: The mean of the rank score of the deformability values in the first outcome group minus the mean of the rank scores of the deformability values in the second outcome group.

<sup>b</sup> Std error difference. The standard error of the score mean difference.

<sup>c</sup> Z: The standardized test statistic.

**Table S3.** Best-fit parameters from cyclization kinetics measurements for the sequences studied here and the corresponding calculated deformability

| Functional outcome         | Gene symbol | Test sequence *                         | Bend angle (°) †,‡ | Twist angle (°) ‡ | Roll and tilt flexibility (°) ‡,§ | Twist flexibility (°) ‡,¶ | Deformability V(B) (° <sup>3</sup> Å <sup>3</sup> ) # |
|----------------------------|-------------|-----------------------------------------|--------------------|-------------------|-----------------------------------|---------------------------|-------------------------------------------------------|
| Cell growth                | CCNG1       | tgtcc <b>TGACATGCCAGGCATGTCT</b> tccaa  | -0.72 (0.09)       | 34.52 (0.08)      | 4.54 (0.09)                       | 5.77 (0.09)               | 2.326                                                 |
| DNA Repair                 | RRM2B       | tgtga <b>GCACAAGCCAGGCTAGTCC</b> gaggc  | -1.49 (0.10)       | 34.14 (0.10)      | 4.20 (0.09)                       | 5.65 (0.09)               | 2.495                                                 |
| Early DDR steps            | p21-5'      | gtcag <b>GAACATGTCCCAACATGTTG</b> agctc | -0.06 (0.08)       | 34.04 (0.09)      | 4.45 (0.08)                       | 5.34 (0.08)               | 2.263                                                 |
| Intrinsic apoptosis        | PMAIP1      | gtcgg <b>GAGCGTGTCCGGGCAGGTCG</b> cgctc | 0.83 (0.12)        | 34.30 (0.15)      | 4.33 (0.11)                       | 5.07 (0.12)               | 2.042                                                 |
| Intrinsic apoptosis        | TP53AIP1    | cctcc <b>TCTCTTGCCCGGGCTTGTCG</b> agatg | -1.02 (0.11)       | 33.96 (0.11)      | 4.20 (0.12)                       | 4.91 (0.10)               | 1.926                                                 |
| Range of values Observed ‖ |             |                                         | -10.0 to 2.4       | 33.96 to 34.85    | 4.20 to 6.40                      | 3.9 to 5.80               |                                                       |

\* Capital bold letters are sequences of natural p53 REs. Lower letters are the natural flanking sequences. The presented parameters are those of the 20-bp REs only.

† Bending is by roll and its center is located at the fourth step of all sequences, i.e. at the C-A, C-G, or C-T step.

‡ Numbers in parenthesis are the simulation errors, calculated as described in ref. (5).

§ Roll and tilt flexibility are the thermal fluctuations of the roll and tilt angle between adjacent base pairs (1, 5).

¶ Twist flexibility is the thermal fluctuation of the twist angle between adjacent bases (1, 5).

# The deformability values are those from Dataset S1, and were calculated as previously described (4), using the values of (8).

‖ These values denote the range of observed values for these parameters in other DNA sequences, determined by the same method used here (2-4, 9).

**Table S4:** ANOVA analysis and Tukey HSD Post-hoc test results of p53-dependent reporter gene assays

**A. Transactivation 48 h after transfection with various levels of p53 plasmid**

| p53 plasmid level  |          | 1 ng           | 2 ng              | 5 ng             | 10 ng            | 25 ng           | 75 ng         |
|--------------------|----------|----------------|-------------------|------------------|------------------|-----------------|---------------|
| ANOVA (F, P value) |          | 4.95,<br>0.004 | 22.85,<br><0.0001 | 16.4,<br><0.0001 | 54.9,<br><0.0001 | 520,<br><0.0001 | 1.13,<br>0.38 |
| Comparison between |          | P values *     |                   |                  |                  |                 |               |
| CCNG1              | RRM2B    | ns             | ns                | ns               | ***              | ***             | ns            |
| CCNG1              | p21-5'   | ns             | *                 | **               | ns               | **              | ns            |
| CCNG1              | PMAIP1   | ns             | ***               | ns               | ***              | ns              | ns            |
| CCNG1              | TP53AIP1 | ns             | ***               | ***              | ns               | ***             | ns            |
| RRM2B              | p21-5'   | ns             | ns                | ***              | ***              | ***             | ns            |
| RRM2B              | PMAIP1   | ns             | ***               | *                | ***              | ***             | ns            |
| RRM2B              | TP53AIP1 | ns             | ***               | ***              | ***              | ***             | ns            |
| p21-5'             | PMAIP1   | *              | *                 | ns               | *                | ns              | ns            |
| p21-5'             | TP53AIP1 | **             | **                | ns               | ns               | ns              | ns            |
| PMAIP1             | TP53AIP1 | ns             | ns                | *                | ns               | *               | ns            |

**B. Transactivation with 25 ng p53 plasmid as a function of time**

| Time               |          | 12 h           | 18 h           | 24 h           |
|--------------------|----------|----------------|----------------|----------------|
| ANOVA (F, P value) |          | 4.34,<br>0.008 | 4.36,<br>0.008 | 79,<br><0.0001 |
| Comparison between |          | P values *     |                |                |
| CCNG1              | RRM2B    | ns             | ns             | ***            |
| CCNG1              | p21-5'   | ns             | ns             | ns             |
| CCNG1              | PMAIP1   | *              | ns             | **             |
| CCNG1              | TP53AIP1 | *              | ns             | ***            |
| RRM2B              | p21-5'   | ns             | ns             | ***            |
| RRM2B              | PMAIP1   | ns             | *              | ***            |
| RRM2B              | TP53AIP1 | ns             | **             | ***            |
| p21-5'             | PMAIP1   | ns             | ns             | ***            |
| p21-5'             | TP53AIP1 | ns             | ns             | ***            |
| PMAIP1             | TP53AIP1 | ns             | ns             | **             |

**C. Transactivation with 2 ng p53 plasmid as a function of time**

| Time               |          | 12 h            | 18 h            | 24 h             |
|--------------------|----------|-----------------|-----------------|------------------|
| ANOVA (F, P value) |          | 152,<br><0.0001 | 903,<br><0.0001 | 8110,<br><0.0001 |
| Comparison between |          | P values *      |                 |                  |
| CCNG1              | RRM2B    | ***             | ***             | ***              |
| CCNG1              | p21-5'   | ***             | ***             | ***              |
| CCNG1              | PMAIP1   | ***             | ***             | ***              |
| CCNG1              | TP53AIP1 | ***             | ***             | ***              |
| RRM2B              | p21-5'   | *               | ***             | ***              |
| RRM2B              | PMAIP1   | **              | ***             | ***              |
| RRM2B              | TP53AIP1 | ***             | ***             | ***              |
| p21-5'             | PMAIP1   | ns              | ns              | ***              |
| p21-5'             | TP53AIP1 | ***             | ***             | ***              |
| PMAIP1             | TP53AIP1 | ***             | ***             | ***              |

\* p values are marked as follows: p > 0.05 ns, p ≤ 0.05 \*, p ≤ 0.01 \*\*, p ≤ 0.001 \*\*\*

**Table S5.** Primers used for incorporation of p53 REs and flanking sequences into pCluc Mini-TK plasmids

| Gene symbol | Primer direction | Sequence (5'→3') *                                      |
|-------------|------------------|---------------------------------------------------------|
| RRM2B       | Forward          | <b>AGGCATGTCT</b> tccaa <u>GGATCCTTCGCATATTAAGGTGAC</u> |
|             | Reverse          | <b>GGCATGTCA</b> ggaca <u>GAATTCCAAGATCTCCCGATCCG</u>   |
| CCNG1       | Forward          | <b>AGGCTAGTCC</b> gaggc <u>GGATCCTTCGCATATTAAGGTGAC</u> |
|             | Reverse          | <b>GGCTTGTGC</b> tcaca <u>GAATTCCAAGATCTCCCGATCCG</u>   |
| p21-5'      | Forward          | <b>CAACATGTTG</b> agctc <u>GGATCCTTCGCATATTAAGGTGAC</u> |
|             | Reverse          | <b>GGACATGTTT</b> ctgac <u>GAATTCCAAGATCTCCCGATCCG</u>  |
| PMAIP1      | Forward          | <b>GGCAGGTCG</b> cgctc <u>GGATCCTTCGCATATTAAGGTGAC</u>  |
|             | Reverse          | <b>GGACACGCTC</b> ccgac <u>GAATTCCAAGATCTCCCGATCCG</u>  |
| TP53AIP1    | Forward          | <b>GGCTTGTTCG</b> agatg <u>GGATCCTTCGCATATTAAGGTGAC</u> |
|             | Reverse          | <b>GGCAAGAGA</b> ggagg <u>GAATTCCAAGATCTCCCGATCCG</u>   |

\* Capital bold letters are the sequences of natural p53 REs. Lower letters are the natural flanking sequences. Underlined capital letters are the plasmid-specific annealing sequences.

**Dataset S1 (separate file).** p53 genes used in the analysis. The Excel file contains the details on the studied genes, their REs, their specific function and the pathways initiated by the specific function, as well as the final functional outcome of their activation, as defined in the main text. Also given are the deformability values ( $V(B)^{0.3\text{\AA}^3}$ ) of the REs and the Pubmed ID of the references supporting the data on each gene. The list includes REs that directly activates p53, do not include spacer sequences between the two half sites, and are found in the promoter on the first intron/exon of the nearby gene.

### SI References

1. Zhang Y & Crothers DM (2003) High-throughput approach for detection of DNA bending and flexibility based on cyclization. *Proc. Natl. Acad. Sci. USA* 100:3161-3166.
2. Beno I, Rosenthal K, Levitine M, Shaulov L, & Haran TE (2011) Sequence-dependent cooperative binding of p53 to DNA targets and its relationship to the structural properties of the DNA targets. *Nucleic Acids Res.* 39:1919-1932.
3. Vyas P, *et al.* (2017) Diverse p53/DNA binding modes expand the repertoire of p53 response elements. *Proc. Natl. Acad. Sci. USA* 114:10624-10629.
4. Senitzki A, *et al.* (2021) The complex architecture of p53 binding sites. *Nucleic Acids Res.* 49:1364–1382.
5. Zhang Y & Crothers DM (2003) Statistical mechanics of sequence-dependent circular DNA and its application for DNA cyclization. *Biophys. J.* 84:136-153.
6. Berg OG & von Hippel PH (1987) Selection of DNA binding sites by regulatory proteins. Statistical- mechanical theory and application to operators and promoters. *J. Mol. Biol.* 193:723-750.
7. Berg OG & von Hippel PH (1988) Selection of DNA binding sites by regulatory proteins. II. The binding specificity of cyclic AMP receptor protein to recognition sites. *J. Mol. Biol.* 200:709-723.
8. Balasubramanian S, Xu F, & Olson WK (2009) DNA sequence-directed organization of chromatin: structure-based computational analysis of nucleosome-binding sequences. *Biophys. J.* 96:2245-2260.
9. Zhang Y, Xi Z, Hegde RS, Shakked Z, & Crothers DM (2004) Predicting indirect readout effects in protein-DNA interactions. *Proc. Natl. Acad. Sci. USA* 101:8337-8341.
